# Supplementary material for: Angiomotin promotes renal epithelial and carcinoma cell proliferation by retaining the nuclear YAP
Source: PubMed Central journal article supplement (PMC4914293; doi:10.18632/oncotarget.7161), 2016-02-03
Supplement: oncotarget-07-12393-s001.pdf [file oncotarget-07-12393-s001.pdf]

**SUPPLEMENTARY FIGURE**

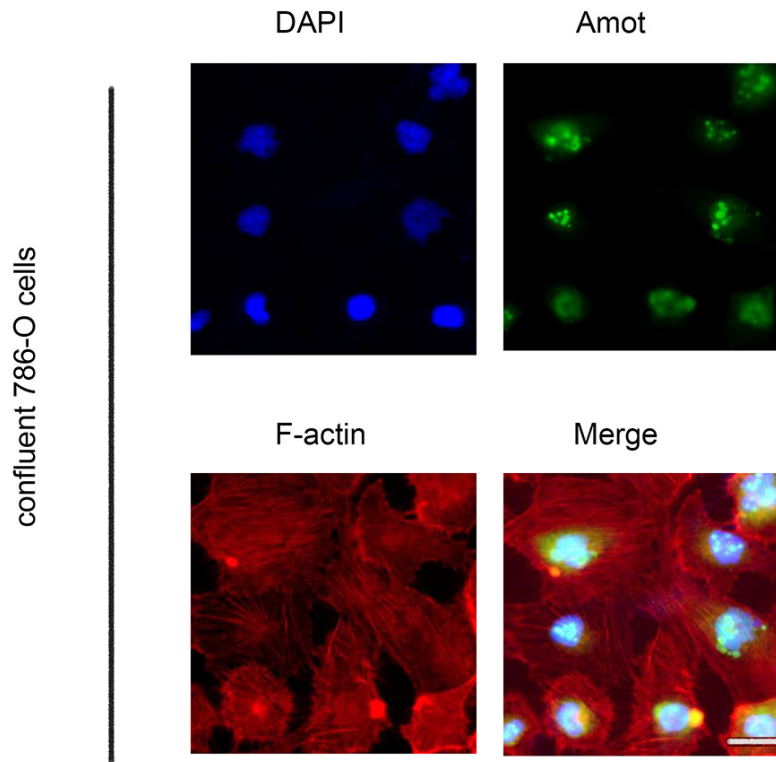

**Supplementary Figure S1: Immunofluorescent analysis of Amot and F-actin expression in 786-O cells cultured at confluent density. Scale bar = 25 $\mu$ m.**
